# Supplementary material
Source: Springer Nature journal article supplement (https://www.springermedizin.de/resource/supplementary/12968_2014_3961_MOESM2_ESM.pdf/9584980)

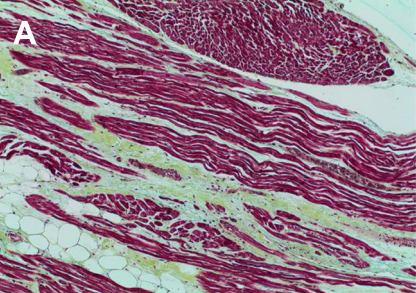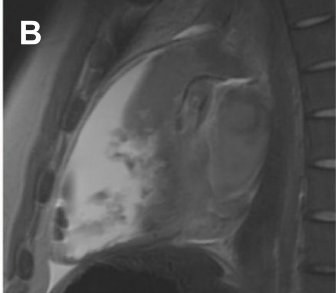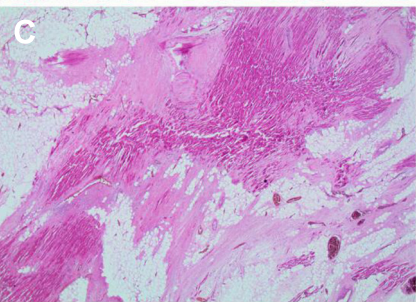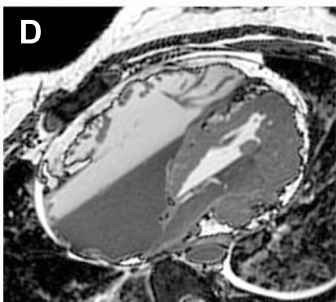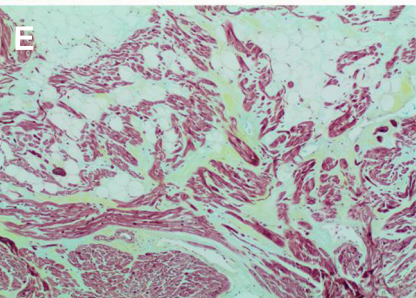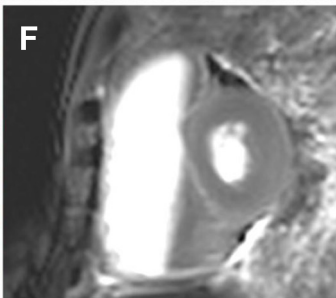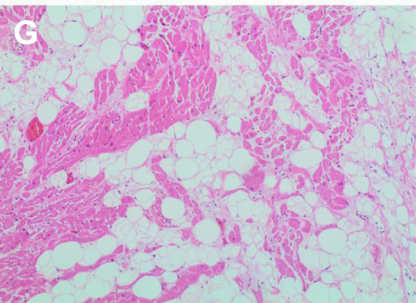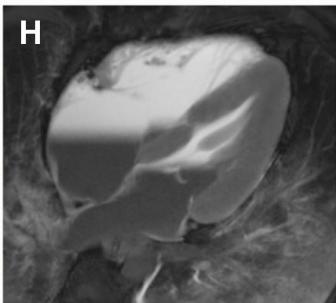

Supplement: MOESM2 [file 9584980]
